# Supplementary material for: Stigma, HIV and health: a qualitative synthesis
Source: Springer Nature journal article supplement (doi:10.1186/s12889-015-2197-0), 2015-09-02
Supplement: MOESM2 [file 9750228]

## Additional Files

### Additional file 2 - Articles excluded from qualitative data extraction

**Description:** This file provides a reference list of papers excluded from the qualitative synthesis at data extraction (i.e. studies that reported only quantitative findings, and studies published in other languages than English, French or Spanish)

#### Articles excluded due to method (reported only quantitative data) (n=65)

1. Berger BE, Ferrans CE, Lashley FR. Measuring stigma in people with HIV: Psychometric assessment of the HIV Stigma Scale. *Res. Nurs. Health.* 2001;24(6):518-529.
2. Bozarth MS. *The relationship of the perception of stigma, depression, social support, and spirituality to the health status of the individual with HIV/AIDS* [Doctorate of Philosophy]. Tallahassee, FL: Department of Human Services and Studies, The Florida State University; 1998.
3. Brennan CS. *Characteristics that affect a HIV infected individual's utilization of HIV medical care* [Doctorate of Philosophy]. Hattiesburg, MS: Nursing, University of Southern Mississippi; 2007.
4. Buseh AG, Kelber ST, Hewitt JB, Stevens PE, Park CG. Perceived stigma and life satisfaction: Experiences of urban African American men living with HIV/AIDS. *Int J Mens Health.* 2006;5(1):35-51.
5. Buseh AG, Kelber ST, Stevens PE, Park CG. Relationship of symptoms, perceived health, and stigma with quality of life among urban HIV-infected African American men. *Public Health Nurs.* 2008;25(5):409-419.
6. Carlucci JG, Kamanga A, Sheneberger R, et al. Predictors of adherence to antiretroviral therapy in rural Zambia. *J Acquir Immune Defic Syndr.* 2008;47(5):615-622.
7. Charney ME. *Understanding the psychological, psychosocial, and physical health status of HIV-positive refugees* [Doctorate of Philosophy]. Boston, MA: Psychology, Boston University; 2008.
8. Clark HJ, Lindner G, Armistead L, Austin B. Stigma, disclosure, and psychological functioning among HIV-infected and non-infected African-American women. *Women Health.* 2003;38(4):57-71.
9. Courtenay-Quirk C, Wolitski RJ, Parsons JT, mez CA. Is HIV/AIDS stigma dividing the gay community? Perceptions of HIV-positive men who have sex with men. *AIDS Educ. Prev.* 2006;18(1):56-67.

10. Demi A, Bakeman R, Sowell R, Moneyham L, Seals B. Suicidal thoughts of women with HIV infection: Effect of stressors and moderating effects of family cohesion. *J. Fam. Psychol.* 1998;12(3):344-353.
11. DiIorio C, McCarty F, DePadilla L, et al. Adherence to antiretroviral medication regimens: A test of a psychosocial model. *AIDS Behav.* 2009;13(1):10-22.
12. Dlamini PS, Wantland D, Makoae LN, et al. HIV stigma and missed medications in HIV-positive people in five African countries. *AIDS Patient Care STDS.* 2009;23(5):377-387.
13. Freeman M, Nkomo N, Kafaar Z, Kelly K. Factors associated with prevalence of mental disorder in people living with HIV/AIDS in South Africa. *AIDS Care.* 2007;19(10):1201-1209.
14. Heckman TG. The chronic illness quality of life (CIQOL) model: explaining life satisfaction in people living with HIV disease. *Health Psychol.* 2003;22(2):140-147.
15. Heckman TG, Anderson ES, Sikkema KJ, Kochman A, Kalichman SC, Anderson T. Emotional distress in nonmetropolitan persons living with HIV disease enrolled in a telephone-delivered, coping improvement group intervention. *Health Psychol.* 2004;23(1):94-100.
16. Heckman TG, Heckman BD, Kochman A, Sikkema KJ, Suhr J, Goodkin K. Psychological symptoms among persons 50 years of age and older living with HIV disease. *Aging Ment. Health.* 2002;6(2):121-128.
17. Heckman TG, Kochman A, Sikkema KJ. Depressive symptoms in older adults living with HIV disease: Application of the Chronic Illness Quality of Life Model. *J Ment Health Aging.* 2002;8(4):267-279.
18. Kalichman SC, Simbayi LC, Cloete A, Mthembu PP, Mkhonta RN, Ginindza T. Measuring AIDS stigmas in people living with HIV/AIDS: The Internalized AIDS-Related Stigma Scale. *AIDS Care.* 2009;21(1):87-93.
19. Kang E, Rapkin BD, DeAlmeida C. Are psychological consequences of stigma enduring or transitory? A longitudinal study of HIV stigma and distress among Asians and Pacific Islanders living with HIV illness. *AIDS Patient Care STDS.* 2006;20(10):712-723.
20. Kang E, Rapkin BD, Remien RH, Mellins CA, Oh A. Multiple dimensions of HIV stigma and psychological distress among Asians and Pacific Islanders living with HIV illness. *AIDS Behav.* 2005;9(2):145-154.
21. Katz S, Nevid JS. Risk factors associated with posttraumatic stress disorder symptomatology in HIV-infected women. *AIDS Patient Care STDS.* 2005;19(2):110-120.
22. Keeney EM. *Traumatic events and PTSD symptomatology in HIV-infected adults and the impact on treatment adherence* [Doctorate of Philosophy]. New York, NY: School of Social Work, New York University; 2008.

23. Kinsler JJ, Wong MD, Sayles JN, Davis C, Cunningham WE. The effect of perceived stigma from a health care provider on access to care among a low-income HIV-positive population. *AIDS Patient Care STDS*. 2007;21(8):584-592.
24. Lang SS. *Social work, psychoneuroimmunology, and HIV/AIDS: An examination of the relationship among health-related hardiness, HIV/AIDS locus of control, stigma, culture, and immune function in persons with HIV/AIDS* [Doctorate of Philosophy]. Denver, CO: Social Work, University of Denver; 2001.
25. Lee RS, Kochman A, Sikkema KJ. Internalized stigma among people living with HIV-AIDS. *AIDS Behav*. 2002;6(4):309-319.
26. Li L, Lee SJ, Thammawijaya P, Jiraphongsa C, Rotheram-Borus MJ. Stigma, social support, and depression among people living with HIV in Thailand. *AIDS Care*. 2009;21(8):1007-1013.
27. Li X, Wang H, Williams A, He G. Stigma reported by people living with HIV in south central China. *J Assoc Nurses AIDS Care*. 2009;20(1):22-30.
28. Lyon DE. *A causal model of the effects of existential well-being on the relationship between severity of human immunodeficiency virus (HIV) disease and depression* [Doctorate of Philosophy]. Richmond, VA: Nursing, Virginia Commonwealth University; 1997.
29. Mak WWS, Cheung RYM, Law RW, Woo J, Li PCK, Chung RWY. Examining attribution model of self-stigma on social support and psychological well-being among people with HIV+/AIDS. *Soc. Sci. Med*. 2007;64(8):1549-1559.
30. Miles MS, Burchinal P, Holditch-Davis D, Wasilewski Y. Personal, family, and health-related correlates of depressive symptoms in mothers with HIV. *J. Fam. Psychol*. 1997;11(1):23-34.
31. Miles MS, Gillespie JV, Holditch-Davis D. Physical and mental health in African American mothers with HIV. *J Assoc Nurses AIDS Care*. 2001;12(4):42-50.
32. Mogengege MA. *If mama's not happy, nobody's happy: An exploration of the influence of stigma, disclosure and family coping on the transmission of maternal depression to children in African-American families affected by HIV/AIDS* [Doctorate of Philosophy]. Washington, D.C.: Black Studies, Howard University; 2008.
33. Moneyham L, Seals B, Sowell R, Hennessy M, Demi A, Brake S. The impact of HIV on emotional distress of infected women: cognitive appraisal and coping as mediators. *Sch. Inq. Nurs. Pract*. 1997;11(2):125-151.
34. Murphy DA, Austin EL, Greenwell L. Correlates of HIV-related stigma among HIV-positive mothers and their uninfected adolescent children. *Women Health*. 2006;44(3):19-42.

35. Naar-King S, Bradford J, Coleman S, Green-Jones M, Cabral H, Tobias C. Retention in care of persons newly diagnosed with HIV: Outcomes of the Outreach Initiative. *AIDS Patient Care STDS*. 2007;21:Supplement.
36. Nachega JB, Stein DM, Lehman DA, et al. Adherence to antiretroviral therapy in HIV-infected adults in Soweto, South Africa. *AIDS Res. Hum. Retroviruses*. 2004;20(10):1053-1056.
37. Pakdewong P, Kasemkitwatana S, Pancharoenworakul K, Miles MS, Kaemkate W. A structural model of maternal role attainment in Thai HIV sero-positive mothers. *Thai J Nurs Res*. 2006;10(3):201-214.
38. Peretti-Watel P, Spire B, Pierret J, Lert F, Obadia Y. Management of HIV-related stigma and adherence to HAART: Evidence from a large representative sample of outpatients attending French hospitals (ANRS-EN12-VESPA 2003). *AIDS Care*. 2006;18(3):254-261.
39. Prachakul W. *Assessment of social support, HIV-related stigma, and social problem-solving as model components of depressive symptomatology in persons with HIV* [Doctorate of Philosophy]. Birmingham, AL: Nursing, University of Alabama at Birmingham; 2005.
40. Prachakul W, Grant JS, Keltner NL. Relationships among functional social support, HIV-related stigma, social problem solving, and depressive symptoms in people living with HIV: A pilot study. *J Assoc Nurses AIDS Care*. 2007;18(6):67-76.
41. Preau M, Bouhnik A, Peretti-Watel P, Obadia Y, Spire B. Suicide attempts among people living with HIV in France. *AIDS Care*. 2008;20(8):917-924.
42. Rajabiun S, Rumptz MH, Felizzola J, et al. The impact of acculturation on Latinos' perceived barriers to HIV primary care. *Ethn. Dis*. 2008;18(4):403-408.
43. Reece M. HIV-related mental health care: Factors influencing dropout among low-income, HIV positive individuals. *AIDS Care*. 2003;15:707-716.
44. Reece MD. *Dropout from community-based, HIV-related psychotherapy: The influence of health beliefs and perceptions of stigma (immune deficiency)* [Doctorate of Philosophy]. Athens, GA, University of Georgia; 2001.
45. Relf MV, Mallinson K, Pawlowski L, Dolan K, Dekker D. HIV-related stigma among persons attending an urban HIV clinic. *J Multicult Nurs Health*. 2005;11(1):14-22.
46. Riggs SA, Vosvick M, Stallings S. Attachment style, stigma and psychological distress among HIV+ adults. *J Health Psychol*. 2007;12(6):922-936.
47. Rintamaki LS, Davis TC, Skripkauskas S, Bennett CL, Wolf MS. Social stigma concerns and HIV medication adherence. *AIDS Patient Care STDS*. 2006;20(5):359-368.

48. Rosenblum Katz S. *Risk factors of post-traumatic stress disorder symptomatology in HIV-infected women* [Doctorate of Philosophy]. New York City, NY: Psychology, St. John's University; 2004.
49. Ryan K, Forehand R, Solomon S, Miller C. Depressive symptoms as a link between barriers to care and sexual risk behavior of HIV-infected individuals living in non-urban areas. *AIDS Care*. 2008;20(3):331-336.
50. Sayles JN, Hays RD, Sarkisian CA, Mahajan AP, Spritzer KL, Cunningham WE. Development and psychometric assessment of a multidimensional measure of internalized HIV stigma in a sample of HIV-positive adults. *AIDS Behav*. 2008;12(5):748-758.
51. Schuster MA, Collins R, Cunningham WE, et al. Perceived discrimination in clinical care in a nationally representative sample of HIV-infected adults receiving health care. *J. Gen. Intern. Med*. 2005(9):807-813.
52. Silver EJ, Bauman LJ, Camacho S, Hudis J. Factors associated with psychological distress in urban mothers with late-stage HIV/AIDS. *AIDS Behav*. 2003;7(4):421-431.
53. Simbayi LC, Kalichman S, Strebel A, Cloete A, Henda N, Mqeketo A. Internalized stigma, discrimination, and depression among men and women living with HIV/AIDS in Cape Town, South Africa. *Soc. Sci. Med*. 2007;64(9):1823-1831.
54. Sohler N, Li X, Cunningham C. Perceived discrimination among severely disadvantaged people with HIV infection. *Public Health Rep*. 2007;122(3):347-355.
55. Sowell RL, Seals BF, Moneyham L, Demi A, Cohen L, Brake S. Quality of life in HIV-infected women in the south-eastern United States. *AIDS Care*. 1997;9(5):501-512.
56. Stutterheim SE, Pryor JB, Bos AER, Hoogendijk R, Muris P, Schaalma HP. HIV-related stigma and psychological distress: The harmful effects of specific stigma manifestations in various social settings. *AIDS*. 2009;23(17):2353-2357.
57. Thomas BE, Rehman F, Suryanarayanan D, et al. How stigmatizing is stigma in the life of people living with HIV: A study on HIV positive individuals from Chennai, South India. *AIDS Care*. 2005;17(7):795-801.
58. Thrasher AD, Earp JA, Golin CE, Zimmer CR. Discrimination, distrust, and racial/ethnic disparities in antiretroviral therapy adherence among a national sample of HIV-infected patients. *J Acquir Immune Defic Syndr*. 2008;49(1):84-93.
59. Vanable PA, Carey MP, Blair DC, Littlewood RA. Impact of HIV-related stigma on health behaviors and psychological adjustment among HIV-positive men and women. *AIDS Behav*. 2006;10(5):473-482.
60. Vance DE. Self-rated emotional health in adults with and without HIV. *Psychol. Rep*. 2006;98(1):106-108

61. Waite KR, Paasche-Orlow M, Rintamaki LS, Davis TC, Wolf MS. Literacy, social stigma, and HIV medication adherence. *J. Gen. Intern. Med.* 2008;23(9):1367-1372.
62. Wight RG. Precursive depression among HIV infected AIDS caregivers over time. *Soc. Sci. Med.* 2000;51(5):759-770.
63. Wingood GM, DiClemente RJ, Mikhail I, et al. HIV discrimination and the health of women living with HIV. *Women Health.* 2007;46(2-3):99-112.
64. Wright K, Naar-King S, Lam P, Templin T, Frey M. Stigma scale revised: Reliability and validity of a brief measure of stigma for HIV+ youth. *J. Adolesc. Health.* 2007;40(1):96-98.
65. Wu DY, Munoz M, Espiritu B, et al. Burden of depression among impoverished HIV-positive women in Peru. *J Acquir Immune Defic Syndr.* 2008;48(4):500-504.

**Articles excluded due to language restrictions (studies published in languages other than French, Spanish or English) (n=11)**

66. 1. Beier S. African Migrants in Germany and Their Way of Coping with HIV/AIDS [German]. *curare*. 2005;2-3( ):188-200.
67. 2. Cao XB, Pang L, Wu ZY. Reasons and patterns of AIDS stigma and intervention strategies [Chinese]. *Chinese Journal of AIDS/STD*. 2005;11(3):243-245.
68. 3. Ferreira RCM, Figueiredo MAdC. Reinserção no mercado de trabalho. Barreiras e silêncio no enfrentamento da exclusão por pessoas com HIV/AIDS [Replacement in the work market. Barriers and silence in the coping of the exclusion for people with HIV/AIDS]. [Portuguese] *Medicina (Ribeirao Preto. Online)*. 2006;39(4):591-600.
69. 4. Figueiredo MAdC, Fioroni LN. Uma análise de conteúdo de crenças relacionadas com a AIDS entre participantes em O.N.G.s [A content analysis of beliefs related to AIDS among NGOs participants]. [Portuguese]. *Estudos de Psicologia*. 1997;2(1):doi: 10.1590/S1413-1294X1997000100003
70. 5. Li X, He G, Wang H. Study of stigma and discrimination related to HIV and AIDS [Chinese]. *Chinese Journal of Nursing*. 2007;42:78-80.
71. 6. Melchior R, Nemes MI, Alencar TM, Buchalla CM. Desafios da adesão ao tratamento de pessoas vivendo com HIV/AIDS no Brasil. [Challenges of treatment adherence by people living with HIV/AIDS in Brazil] [Portuguese]. *Rev. Saude Publica*. 2007;41 (Suppl 2):87-93.
72. 7. Savin K. Stigmatizacija HIV pozitivnih zavisnika od droga u okviru medicinskog sistema [Stigmatization of HIV-positive drug addicts within the medical system] [Serbian]. *Socioloski Pregled*. 1996;30(2):193-204.
73. 8. Tunala LG. Daily sources of stress among HIV-positive women. [Portuguese]. *Rev. Saude Publica*. 2002;36(4 Suppl):24-31.
74. 9. Voseckova A, Pelcak S, Sansevicova E. Psychosocial aspects of testing HIV infection. [Czech]. *Prakticky Lekar*. 1999;79(11):615-617.
75. 10. Wang Y, Dong H, Zhang Y, Zhang R, Lu L. The mental problems and needs in patients under AIDS/HIV discrimination [Chinese]. *Chinese Remedies & Clinics*. 2010;7:524-526.
76. 11. Yan J, Xiao Sy, Zhou L, Tang Y. Development of perceived stigma scale for children affected by HIV/AIDS. [Chinese]. *Chinese Journal of Clinical Psychology*. 2008;16(2):129.
