# Supplementary material for: Stigma, HIV and health: a qualitative synthesis
Source: Springer Nature journal article supplement (doi:10.1186/s12889-015-2197-0), 2015-09-02
Supplement: MOESM4 [file 9750228]

## Additional Files

### Additional File 4 - Matrix summary of qualitative themes

Description: This file classifies the common themes related to HIV, stigma and health as identified in the included studies.

|                              |                           | Conceptualizing Stigma |             |                 |            |                   | Experiencing Stigma |                             |                                  |                    |                        | Managing Stigma          |                 |                   |
|------------------------------|---------------------------|------------------------|-------------|-----------------|------------|-------------------|---------------------|-----------------------------|----------------------------------|--------------------|------------------------|--------------------------|-----------------|-------------------|
|                              |                           | Enacted Stigma         | Felt Stigma | Marginalization | Disclosure | Morals and Values | Visible Health      | Stigma + Health Care Access | Stigma + Health Care Utilization | Stigma + Adherence | Stigma + Mental Health | Stigma + Physical Health | Avoiding Stigma | Addressing Stigma |
| <i>Agne (2000)</i>           | <i>United States</i>      |                        | Y           |                 | Y          |                   |                     | Y                           | Y                                |                    |                        |                          |                 | Y                 |
| <i>Anderson (2008)</i>       | <i>United Kingdom</i>     | Y                      | Y           | Y               | Y          | Y                 | Y                   | Y                           | Y                                |                    | Y                      |                          | Y               | Y                 |
| <i>Balabanova (2006)</i>     | <i>Russian Federation</i> | Y                      | Y           |                 | Y          | Y                 |                     | Y                           |                                  |                    | Y                      |                          |                 | Y                 |
| <i>Barnes (2000)</i>         | <i>United States</i>      |                        | Y           | Y               | Y          |                   |                     | Y                           | Y                                |                    | Y                      |                          | Y               | Y                 |
| <i>Bikaako-Kajura (2006)</i> | <i>Uganda</i>             |                        |             |                 | Y          |                   |                     |                             |                                  | Y                  |                        |                          |                 | Y                 |
| <i>Brickley (2007)</i>       | <i>Vietnam</i>            | Y                      | Y           | Y               | Y          | Y                 | Y                   | Y                           | Y                                |                    | Y                      |                          | Y               | Y                 |
| <i>Brion (2007)</i>          | <i>United States</i>      |                        | Y           |                 | Y          |                   | Y                   |                             |                                  | Y                  |                        |                          | Y               |                   |
| <i>Buseh (2006)</i>          | <i>United States</i>      | Y                      | Y           | Y               | Y          | Y                 | Y                   | Y                           | Y                                | Y                  | Y                      |                          | Y               | Y                 |
| <i>CAAT(2008)</i>            | <i>Canada</i>             | Y                      | Y           | Y               | Y          |                   |                     | Y                           | Y                                |                    | Y                      |                          | Y               | Y                 |
| <i>Cain (2001)</i>           | <i>United States</i>      |                        | Y           | Y               |            |                   |                     | Y                           | Y                                |                    |                        |                          | Y               | Y                 |
| <i>Cao (2006)</i>            | <i>China</i>              | Y                      | Y           | Y               | Y          | Y                 |                     | Y                           | Y                                |                    |                        |                          | Y               | Y                 |
| <i>Carr (2004)</i>           | <i>United States</i>      | Y                      | Y           |                 | Y          | Y                 |                     | Y                           |                                  | Y                  | Y                      |                          | Y               | Y                 |
| <i>Castro (1998)</i>         | <i>Mexico</i>             | Y                      | Y           | Y               | Y          | Y                 |                     | Y                           | Y                                |                    | Y                      |                          |                 | Y                 |

|                             |                       | Conceptualizing Stigma |             |                 |            |                   |                | Experiencing Stigma         |                                  |                    |                        |                          | Managing Stigma |                   |
|-----------------------------|-----------------------|------------------------|-------------|-----------------|------------|-------------------|----------------|-----------------------------|----------------------------------|--------------------|------------------------|--------------------------|-----------------|-------------------|
|                             |                       | Enacted Stigma         | Felt Stigma | Marginalization | Disclosure | Morals and Values | Visible Health | Stigma + Health Care Access | Stigma + Health Care Utilization | Stigma + Adherence | Stigma + Mental Health | Stigma + Physical Health | Avoiding Stigma | Addressing Stigma |
| <i>Dawson-Rose (2005)</i>   | <i>United States</i>  | Y                      | Y           | Y               | Y          | Y                 |                | Y                           | Y                                |                    |                        |                          | Y               | Y                 |
| <i>Edwards (2006)</i>       | <i>United States</i>  | Y                      | Y           |                 | Y          |                   |                |                             |                                  | Y                  |                        |                          |                 | Y                 |
| <i>Elamon (2005)</i>        | <i>India</i>          | Y                      | Y           |                 | Y          |                   |                | Y                           |                                  |                    |                        |                          |                 |                   |
| <i>Emler (2007)</i>         | <i>United States</i>  | Y                      | Y           | Y               | Y          | Y                 |                | Y                           |                                  |                    |                        |                          |                 |                   |
| <i>Erwin (1999)</i>         | <i>United Kingdom</i> |                        |             | Y               | Y          |                   |                | Y                           | Y                                | Y                  |                        |                          | Y               |                   |
| <i>Gardezi (2008)</i>       | <i>Canada</i>         | Y                      |             | Y               | Y          | Y                 |                | Y                           | Y                                |                    |                        |                          |                 | Y                 |
| <i>Gaudine (2007)</i>       | <i>Vietnam</i>        | Y                      | Y           |                 | Y          | Y                 |                | Y                           |                                  |                    |                        |                          | Y               | Y                 |
| <i>Geurtsen (2005)</i>      | <i>Cambodia</i>       | Y                      | Y           |                 | Y          | Y                 |                |                             |                                  |                    | Y                      |                          | Y               | Y                 |
| <i>Greeff (2007)</i>        | <i>South Africa</i>   | Y                      | Y           |                 | Y          | Y                 |                | Y                           |                                  |                    | Y                      |                          | Y               |                   |
| <i>Green (1997)</i>         | <i>United Kingdom</i> |                        | Y           | Y               | Y          |                   |                | Y                           | Y                                |                    |                        |                          |                 | Y                 |
| <i>Herrera (2008)</i>       | <i>Mexico</i>         |                        | Y           | Y               |            |                   |                | Y                           | Y                                |                    | Y                      |                          | Y               |                   |
| <i>Ingram (1999)</i>        | <i>United States</i>  | Y                      | Y           | Y               | Y          | Y                 | Y              | Y                           |                                  | Y                  |                        |                          | Y               | Y                 |
| <i>Konkle-Parker (2008)</i> | <i>United States</i>  | Y                      | Y           |                 |            |                   |                |                             |                                  | Y                  |                        |                          |                 | Y                 |
| <i>Kumarasamy (2005)</i>    | <i>India</i>          | Y                      | Y           |                 | Y          |                   |                |                             |                                  |                    |                        |                          | Y               | Y                 |
| <i>Lindau (2006)</i>        | <i>United States</i>  |                        | Y           |                 | Y          | Y                 |                | Y                           | Y                                |                    | Y                      |                          | Y               | Y                 |
| <i>Maher (2007)</i>         | <i>Vietnam</i>        | Y                      |             | Y               | Y          | Y                 |                | Y                           | Y                                |                    |                        |                          |                 | Y                 |
| <i>Mill (2003)</i>          | <i>Ghana</i>          | Y                      | Y           | Y               | Y          | Y                 | Y              |                             | Y                                |                    | Y                      |                          |                 | Y                 |
| <i>Mills (2006)</i>         | <i>South Africa</i>   | Y                      |             | Y               | Y          | Y                 |                | Y                           | Y                                |                    |                        |                          |                 | Y                 |
| <i>Murray (2009)</i>        | <i>Zambia</i>         |                        | Y           | Y               |            |                   |                |                             |                                  | Y                  | Y                      |                          |                 |                   |

|                            |                                     | Conceptualizing Stigma |             |                 |            |                   | Experiencing Stigma |                             |                                  |                    |                        | Managing Stigma          |                 |                   |
|----------------------------|-------------------------------------|------------------------|-------------|-----------------|------------|-------------------|---------------------|-----------------------------|----------------------------------|--------------------|------------------------|--------------------------|-----------------|-------------------|
|                            |                                     | Enacted Stigma         | Felt Stigma | Marginalization | Disclosure | Morals and Values | Visible Health      | Stigma + Health Care Access | Stigma + Health Care Utilization | Stigma + Adherence | Stigma + Mental Health | Stigma + Physical Health | Avoiding Stigma | Addressing Stigma |
| <i>Muyinda (1997)</i>      | <i>Uganda</i>                       | Y                      | Y           | Y               |            | Y                 | Y                   | Y                           | Y                                |                    | Y                      |                          | Y               | Y                 |
| <i>Napravnik (2000)</i>    | <i>United States</i>                |                        | Y           | Y               | Y          | Y                 |                     | Y                           | Y                                |                    | Y                      |                          |                 | Y                 |
| <i>Nguyen (2008)</i>       | <i>Vietnam</i>                      |                        |             | Y               |            |                   |                     | Y                           | Y                                |                    |                        |                          | Y               | Y                 |
| <i>Pugatch (2002)</i>      | <i>United States</i>                |                        | Y           |                 | Y          |                   |                     |                             |                                  | Y                  |                        |                          | Y               | Y                 |
| <i>Rajabiun (2007)</i>     | <i>United States</i>                |                        | Y           | Y               |            |                   |                     | Y                           | Y                                |                    | Y                      |                          | Y               | Y                 |
| <i>Rao (2007)</i>          | <i>United States</i>                | Y                      |             |                 | Y          |                   |                     |                             |                                  | Y                  |                        |                          |                 |                   |
| <i>Rintamaki (2007)</i>    | <i>United States</i>                | Y                      |             |                 |            | Y                 |                     | Y                           |                                  |                    |                        |                          |                 |                   |
| <i>Roberson (2007)</i>     | <i>United States</i>                | Y                      | Y           | Y               | Y          |                   |                     | Y                           |                                  | Y                  |                        |                          |                 | Y                 |
| <i>Roberts (2005)</i>      | <i>United States</i>                |                        | Y           |                 | Y          |                   |                     |                             |                                  | Y                  |                        |                          |                 |                   |
| <i>Rutledge (2009)</i>     | <i>Grenada; Trinidad and Tobago</i> | Y                      | Y           | Y               |            | Y                 |                     | Y                           | Y                                |                    |                        |                          |                 | Y                 |
| <i>Sabin (2008)</i>        | <i>China</i>                        | Y                      | Y           | Y               | Y          | Y                 |                     | Y                           |                                  | Y                  | Y                      |                          |                 | Y                 |
| <i>Sanjobo (2008)</i>      | <i>Zambia</i>                       | Y                      | Y           |                 | Y          |                   |                     | Y                           |                                  | Y                  | Y                      |                          |                 | Y                 |
| <i>Sayles (2007)</i>       | <i>United States</i>                | Y                      | Y           | Y               | Y          | Y                 | Y                   | Y                           | Y                                | Y                  | Y                      |                          | Y               | Y                 |
| <i>Schilder (2001)</i>     | <i>Canada</i>                       |                        |             | Y               |            | Y                 |                     | Y                           | Y                                |                    |                        |                          |                 | Y                 |
| <i>Starks (2008)</i>       | <i>China</i>                        | Y                      | Y           |                 | Y          |                   |                     | Y                           | Y                                | Y                  |                        |                          |                 |                   |
| <i>Steward (2008)</i>      | <i>India</i>                        | Y                      | Y           |                 | Y          |                   |                     | Y                           | Y                                |                    | Y                      |                          | Y               |                   |
| <i>Surlis (2001)</i>       | <i>Ireland</i>                      |                        | Y           | Y               |            | Y                 |                     | Y                           |                                  |                    |                        |                          |                 | Y                 |
| <i>Thi (2008)</i>          | <i>Vietnam</i>                      | Y                      | Y           | Y               | Y          | Y                 |                     | Y                           | Y                                |                    | Y                      |                          | Y               | Y                 |
| <i>Tippett Barr (2007)</i> | <i>Botswana</i>                     | Y                      | Y           | Y               | Y          | Y                 | Y                   |                             |                                  | Y                  |                        |                          |                 | Y                 |

|                       |                      | Conceptualizing Stigma |             |                 |            |                   | Experiencing Stigma |                             |                                  |                    |                        | Managing Stigma          |                 |                   |
|-----------------------|----------------------|------------------------|-------------|-----------------|------------|-------------------|---------------------|-----------------------------|----------------------------------|--------------------|------------------------|--------------------------|-----------------|-------------------|
|                       |                      | Enacted Stigma         | Felt Stigma | Marginalization | Disclosure | Morals and Values | Visible Health      | Stigma + Health Care Access | Stigma + Health Care Utilization | Stigma + Adherence | Stigma + Mental Health | Stigma + Physical Health | Avoiding Stigma | Addressing Stigma |
| <i>Wang (2008)</i>    | <i>China</i>         | Y                      | Y           | Y               |            |                   |                     | Y                           | Y                                |                    |                        |                          | Y               | Y                 |
| <i>Ware (2006)</i>    | <i>United States</i> | Y                      | Y           | Y               | Y          |                   |                     |                             | Y                                | Y                  | Y                      |                          | Y               | Y                 |
| <i>Wrubel (2005)</i>  | <i>United States</i> |                        | Y           |                 | Y          |                   |                     |                             |                                  | Y                  |                        |                          |                 |                   |
| <i>Zukoski (2009)</i> | <i>United States</i> | Y                      | Y           | Y               | Y          | Y                 |                     | Y                           |                                  |                    |                        |                          |                 | Y                 |
|                       |                      | <b>37</b>              | <b>46</b>   | <b>34</b>       | <b>43</b>  | <b>29</b>         | <b>9</b>            | <b>41</b>                   | <b>30</b>                        | <b>20</b>          | <b>23</b>              | <b>0</b>                 | <b>27</b>       | <b>42</b>         |
